# Supplementary material for: An Extended Network of Genomic Maintenance in the Archaeon Pyrococcus abyssi Highlights Unexpected Associations between Eucaryotic Homologs
Source: PubMed Central journal article supplement (PMC3820547; doi:10.1371/journal.pone.0079707), 2013-11-07
Supplement: pone.0079707.s003.pdf [file pone.0079707.s003.pdf]

**Table S1: High confidence subset of the interactions detected**

| <i>Bait</i>                  | <i>Prey</i> | <i>Annotated function</i>                      | <i>SR-</i> | <i>SR+</i> |
|------------------------------|-------------|------------------------------------------------|------------|------------|
| <b>MCM</b>                   | Q9UYR7      | MCM                                            | 0,00       | 0,00       |
|                              | Q9UZ12      | ERCC2/XPD                                      | 0,09       | 0,12       |
|                              | Q9V114      | RNAP rpoA1                                     | 0,12       | 0,15       |
| <b>Gins 23</b>               | Q9UYR8      | Gins23                                         | 0,04       | 0,04       |
|                              | Q9V0Z9      | Atp-binding transport protein                  | 0,20       | 0,12       |
|                              | Q9UYR2      | Q9UYR2                                         | 0,19       | 0,16       |
| <b>Gins 51</b>               | Q9UYX9      | Gins51                                         | 0,00       | 0,00       |
|                              | Q9V2F3      | DNA polymerase D ssu                           | 0,07       | 0,11       |
| <b>RecJ-like exonuclease</b> | Q9V2K8      | RecJ-like single-stranded exonuclease          | 0,00       | 0,00       |
|                              | Q9V256      | Q9V256                                         | 0,04       | 0,20       |
| <b>PCNA</b>                  | Q9V0P9      | Fen1                                           | 0,03       | 0,02       |
|                              | Q9V1Z5      | ERCC4/XPF                                      | 0,06       | 0,11       |
|                              | Q9UYE0      | Metallo-beta-lactamase pab1035                 | 0,07       | 0,10       |
|                              | P0CL76      | DNA polymerase B                               | 0,08       | 0,06       |
|                              | Q9V104      | Q9V104                                         | 0,08       | 0,05       |
|                              | Q9V2E8      | NucS                                           | 0,09       | 0,07       |
|                              | Q9V2G3      | RFC-ls                                         | 0,10       | 0,16       |
|                              | Q9UZC8      | Rad50                                          | 0,11       | 0,02       |
|                              | Q9UZC9      | Mre11                                          | 0,11       | 0,03       |
| <b>DNA polymerase B</b>      | P0CL76      | DNA polymerase B                               | 0,00       | 0,01       |
| <b>DNA polymerase D</b>      | Q9V2F4      | DNA polymerase D ls                            | 0,00       | 0,00       |
|                              | Q9V2F3      | DNA polymerase D ss                            | 0,00       | 0,00       |
|                              | Q9V1Z1      | RPA32                                          | 0,04       | 0,09       |
|                              | Q9V291      | DNA primase P46                                | 0,06       | 0,13       |
|                              | Q9UY07      | Nucleotidyltransferase                         | 0,07       | 0,16       |
|                              | Q9V1Y9      | RPA41                                          | 0,10       | 0,19       |
| <b>DNA primase P41</b>       | Q9V233      | radA                                           | 0,01       | 0,01       |
|                              | Q9V292      | DNA primase P41                                | 0,04       | 0,02       |
|                              | P0CL75      | DNA ligase                                     | 0,10       | 0,08       |
| <b>DNA primase P46</b>       | Q9V291      | DNA primase P46                                | 0,00       | 0,00       |
|                              | Q9V233      | radA                                           | 0,03       | 0,03       |
| <b>DNA Ligase</b>            | P0CL74      | DNA Ligase                                     | 0,00       | 0,00       |
|                              | Q9UZ86      | Reverse gyrase                                 | 0,09       | 0,12       |
|                              | Q9V114      | RNAP rpoA1                                     | 0,12       | 0,15       |
| <b>Fen1</b>                  | Q9V0P9      | Fen1                                           | 0,00       | 0,00       |
|                              | Q9UYE0      | Metallo-beta-lactamase pab1035                 | 0,09       | 0,06       |
|                              | Q9UYX8      | PCNA                                           | 0,11       | 0,11       |
| <b>RNaseHII</b>              | Q9V1A9      | Ribonuclease HII                               | 0,00       | 0,00       |
|                              | Q9V2M1      | putative ATP-dependent RNA helicase            | 0,16       | 0,18       |
| <b>DNA2 homolog</b>          | Q9V2G5      | DNA2 homolog                                   | 0,01       | 0,00       |
|                              | Q9UY85      | RecJ-like phosphoesterase                      | 0,04       | 0,02       |
|                              | Q9V1Z1      | RPA32                                          | 0,04       | 0,02       |
|                              | Q9UYI3      | GTP-binding protein                            | 0,04       | 0,03       |
|                              | Q9V0E5      | RNA-binding protein                            | 0,08       | 0,17       |
|                              | Q9UZB6      | DNA helicase, putative                         | 0,09       | 0,10       |
|                              | Q9V2F9      | RNA-binding protein AU-1                       | 0,10       | 0,09       |
|                              | Q9V1V1      | 50S ribosomal protein L6P                      | 0,11       | 0,18       |
|                              | Q9UZ86      | Reverse gyrase                                 | 0,14       | 0,12       |
|                              | Q8J2X9      | Q8J2X9                                         | 0,14       | 0,06       |
|                              | Q9UZN0      | 7-cyano-7-deazaguanine tRNA-ribosyltransferase | 0,08       | 0,20       |
| <b>RPA</b>                   | Q9UY07      | Nucleotidyltransferase                         | 0,00       | 0,00       |
|                              | Q9V1Z1      | RPA32                                          | 0,00       | 0,00       |
|                              | Q9V1Y9      | RPA41                                          | 0,01       | 0,00       |
|                              | Q9V1Z0      | RPA14                                          | 0,01       | 0,00       |
|                              | Q9V1Z5      | ERCC4/XPF                                      | 0,04       | 0,08       |
|                              | Q9V113      | RNAP rpoA2                                     | 0,05       | 0,08       |

|                             |        |                                        |      |      |
|-----------------------------|--------|----------------------------------------|------|------|
|                             | Q9UYS8 | DNA topoisomerase 1                    | 0,06 | 0,07 |
|                             | Q9UZM4 | Lhr-2 large helicase-related protein   | 0,06 | 0,05 |
|                             | Q9UZ86 | Reverse gyrase                         | 0,06 | 0,14 |
|                             | Q9V114 | RNAP rpoA1                             | 0,06 | 0,10 |
|                             | Q9V0H2 | Lhr-1 large helicase-related protein   | 0,06 | 0,09 |
|                             | Q9V2G5 | DNA2                                   | 0,07 | 0,10 |
|                             | Q9UYC4 | ERCC3/XPB                              | 0,09 | 0,13 |
|                             | Q9V1X8 | HsdM                                   | 0,10 | 0,11 |
| <b>NucS</b>                 | Q9V2E8 | NucS                                   | 0,00 | 0,00 |
|                             | Q9UYX8 | PCNA                                   | 0,00 | 0,00 |
|                             | Q9V1Z5 | ERCC4/XPF                              | 0,03 | 0,04 |
|                             | Q9UYE0 | Metallo-beta-lactamase pab1035         | 0,03 | 0,03 |
|                             | Q9UZ60 | minD/MRP superfamily ATPase            | 0,04 | 0,15 |
|                             | Q9V076 | Metallo-beta-lactamase pab1751         | 0,05 | 0,08 |
|                             | Q9V2F8 | Q9V2F8                                 | 0,06 | 0,11 |
|                             | Q9V113 | RNAP rpoA2                             | 0,07 | 0,12 |
|                             | Q9V2G3 | RFC-ls                                 | 0,07 | 0,12 |
|                             | Q9UYC4 | ERCC3/XPB                              | 0,08 | 0,15 |
|                             | Q9V1X9 | HsdS                                   | 0,09 | 0,13 |
|                             | Q9UXY5 | Histone acetyltransferase Elp3 homolog | 0,09 | 0,11 |
|                             | Q9V1F5 | Archaeal histone B                     | 0,09 | 0,08 |
|                             | Q9V0B3 | Adenine-specific DNA methylase         | 0,10 | 0,19 |
|                             | Q9V2G4 | RFC-ss                                 | 0,11 | 0,11 |
|                             | Q9UZY0 | N-glycosylase/DNA lyase/OGG1           | 0,12 | 0,19 |
|                             | Q9UYC3 | BAX1/Uncharacterized ArCR              | 0,13 | 0,13 |
|                             | Q9UYB0 | ApeH acylamino-acid-releasing enzyme   | 0,13 | 0,12 |
|                             | Q9V135 | Type II DNA topoisomerase VI subunit B | 0,14 | 0,17 |
|                             | Q9UZT4 | Q9UZT4                                 | 0,15 | 0,18 |
|                             | P61881 | Archaeal histone A                     | 0,15 | 0,15 |
|                             | Q9V2K6 | Q9V2K6                                 | 0,18 | 0,12 |
| <b>Mre11/Rad50 complex</b>  | Q9UZC8 | Rad50                                  | 0,01 | 0,01 |
|                             | Q9UYX8 | PCNA                                   | 0,02 | 0,10 |
|                             | Q9UZC9 | Mre11                                  | 0,04 | 0,06 |
| <b>RadA</b>                 | Q9V233 | radA                                   | 0,01 | 0,01 |
|                             | Q9V076 | Metallo-beta-lactamase pab1751         | 0,09 | 0,14 |
|                             | P0CL75 | DNA ligase                             | 0,12 | 0,09 |
| <b>RadB</b>                 | Q9V2F6 | radB                                   | 0,01 | 0,01 |
|                             | Q9UYR4 | Q9UYR4                                 | 0,13 | 0,20 |
|                             | Q9UZT4 | Q9UZT4                                 | 0,14 | 0,12 |
|                             | P0CL75 | DNA ligase                             | 0,20 | 0,17 |
| <b>Alka DNA glycosylase</b> | Q9UZ73 | AlkA 3-methyladenine DNA glycosylase   | 0,00 | 0,00 |
|                             | Q9V113 | RNAP rpoA2                             | 0,01 | 0,01 |
|                             | Q9UZM4 | Lhr-2 large helicase-related protein   | 0,02 | 0,01 |
|                             | Q9V1X9 | HsdS                                   | 0,02 | 0,01 |
|                             | Q9V1Y1 | HsdR                                   | 0,02 | 0,04 |
|                             | Q9V2I6 | Fructose-bisphosphate aldolase class 1 | 0,02 | 0,03 |
|                             | Q9V1Z1 | RPA32                                  | 0,02 | 0,07 |
|                             | Q9V051 | Putative ATPase of the AAA superfamily | 0,03 | 0,03 |
|                             | Q9V0V0 | Glycerol-1-phosphate dehydrogenase     | 0,05 | 0,05 |
|                             | Q9V2F9 | RNA-binding protein AU-1               | 0,05 | 0,04 |
|                             | Q9V2B6 | Q9V2B6                                 | 0,05 | 0,05 |
|                             | Q9UZ86 | Reverse gyrase                         | 0,05 | 0,05 |
|                             | Q9V114 | RNAP rpoA1                             | 0,05 | 0,05 |
|                             | Q9V076 | Metallo-beta-lactamase pab1751         | 0,06 | 0,07 |
|                             | Q9V2K6 | Q9V2K6                                 | 0,06 | 0,07 |
|                             | Q9UZB6 | DNA helicase, putative                 | 0,06 | 0,06 |
|                             | Q9UYS8 | DNA topoisomerase 1                    | 0,07 | 0,05 |
|                             | Q9UY25 | Endonuclease IV                        | 0,08 | 0,11 |
|                             | Q9V1Y9 | RPA41                                  | 0,09 | 0,13 |
|                             | Q9V115 | RNAP rpoB                              | 0,09 | 0,08 |
|                             | Q9UY23 | RNAP rpoE1                             | 0,10 | 0,13 |

|                                          |        |                                                    |      |      |
|------------------------------------------|--------|----------------------------------------------------|------|------|
|                                          | Q9UZP0 | RNAP rpoF                                          | 0,10 | 0,11 |
|                                          | Q9UZ60 | minD/MRP superfamily ATPase                        | 0,10 | 0,14 |
|                                          | Q9UXY5 | Histone acetyltransferase Elp3 homolog             | 0,10 | 0,09 |
|                                          | Q9V2J5 | MoaB-1                                             | 0,10 | 0,07 |
|                                          | Q9V0W6 | Endonuclease III                                   | 0,11 | 0,12 |
|                                          | Q9V1X8 | HsdM                                               | 0,12 | 0,10 |
|                                          | Q9V291 | DNA primase P46                                    | 0,13 | 0,12 |
|                                          | Q9UY16 | Q9UY16                                             | 0,13 | 0,14 |
|                                          | Q9V2D7 | Q9V2D7                                             | 0,14 | 0,10 |
|                                          | Q9UZD5 | L-tyrosine decarboxylase                           | 0,17 | 0,18 |
| <b>OGG1 N-glycosylase/DNA lyase</b>      | Q9V1Z0 | RPA14                                              | 0,00 | 0,00 |
|                                          | Q9UY07 | Nucleotidyltransferase                             | 0,00 | 0,00 |
|                                          | Q9UZY0 | N-glycosylase/DNA lyase/OGG1                       | 0,01 | 0,01 |
|                                          | Q9UZM4 | Lhr-2 large helicase-related protein               | 0,01 | 0,01 |
|                                          | Q9V1Z1 | RPA32                                              | 0,01 | 0,01 |
|                                          | Q9UYS8 | DNA topoisomerase 1                                | 0,01 | 0,01 |
|                                          | Q9V0H2 | Lhr-1 large helicase-related protein               | 0,02 | 0,02 |
|                                          | Q9V1Y9 | RPA41                                              | 0,02 | 0,02 |
|                                          | Q9UZ86 | Reverse gyrase                                     | 0,02 | 0,02 |
|                                          | Q9V113 | RNAP rpoA2                                         | 0,03 | 0,03 |
|                                          | Q9V0W6 | Endonuclease III                                   | 0,07 | 0,10 |
|                                          | Q9V2J5 | MoaB-1                                             | 0,07 | 0,08 |
|                                          | Q9V292 | DNA primase P41                                    | 0,07 | 0,08 |
|                                          | Q9V227 | GptA purine phosphoribosyltransferase              | 0,08 | 0,07 |
|                                          | Q9UZP0 | RNAP rpoF                                          | 0,08 | 0,10 |
|                                          | Q9UY23 | RNAP rpoE 1                                        | 0,09 | 0,10 |
|                                          | Q9V1N7 | Methylated-DNA--protein-cysteine methyltransferase | 0,09 | 0,11 |
|                                          | Q9UZX1 | Q9UZX1                                             | 0,10 | 0,10 |
|                                          | Q9V0F2 | putative Phosphoesterase                           | 0,10 | 0,10 |
|                                          | Q9V2M4 | RNAP rpoL                                          | 0,11 | 0,12 |
|                                          | Q9V0B1 | Q9V0B1                                             | 0,12 | 0,10 |
|                                          | Q9V114 | RNAP rpoA1                                         | 0,13 | 0,10 |
|                                          | Q9V116 | RNAP rpoH                                          | 0,14 | 0,13 |
|                                          | Q9UZW9 | Q9UZW9                                             | 0,16 | 0,20 |
|                                          | Q9V2B6 | Q9V2B6                                             | 0,17 | 0,16 |
| <b>NAD-dependant protein deacetylase</b> | Q9UZE7 | NAD-dependant protein deacetylase                  | 0,02 | 0,02 |
|                                          | Q9UYR4 | Q9UYR4                                             | 0,10 | 0,12 |
| <b>PHP domain containing protein</b>     | Q9V0F9 | Putative phosphotransferase, php family            | 0,00 | 0,00 |
|                                          | Q9UZT4 | Q9UZT4                                             | 0,20 | 0,20 |
| <b>Rad-25 like</b>                       | Q9V278 | DNA repair protein RAD25                           | 0,00 | 0,00 |
|                                          | Q9V113 | RNAP rpoA2                                         | 0,02 | 0,01 |
|                                          | Q9V1Z1 | RPA32                                              | 0,05 | 0,13 |
|                                          | Q9V2F9 | RNA-binding protein AU-1                           | 0,06 | 0,08 |
|                                          | Q9V114 | RNAP rpoA1                                         | 0,07 | 0,07 |
|                                          | Q9UZP0 | RNAP rpoF                                          | 0,10 | 0,16 |
|                                          | Q9V2B6 | Q9V2B6                                             | 0,10 | 0,09 |
|                                          | Q9UY96 | Putative flavoprotein monooxygenase                | 0,12 | 0,14 |
|                                          | Q9UZ86 | Reverse gyrase                                     | 0,16 | 0,12 |
|                                          | Q9V115 | RNAP rpoB                                          | 0,16 | 0,17 |
|                                          | Q9UY23 | RNAP rpoE 1                                        | 0,16 | 0,20 |
|                                          | Q9UZM4 | Lhr-2 large helicase-related protein               | 0,17 | 0,04 |
